# Supplementary material for: Spectral properties of ionic benzotristhiazole based donor-acceptor NLO-phores in polymer matrices and their one- and two-photon cellular imaging ability
Source: Royal Society of Chemistry journal article supplement (doi:10.1039/c7pp00239d), 2017-10-31
Supplement: c7pp00239d2.pdf [file c7pp00239d2.pdf]

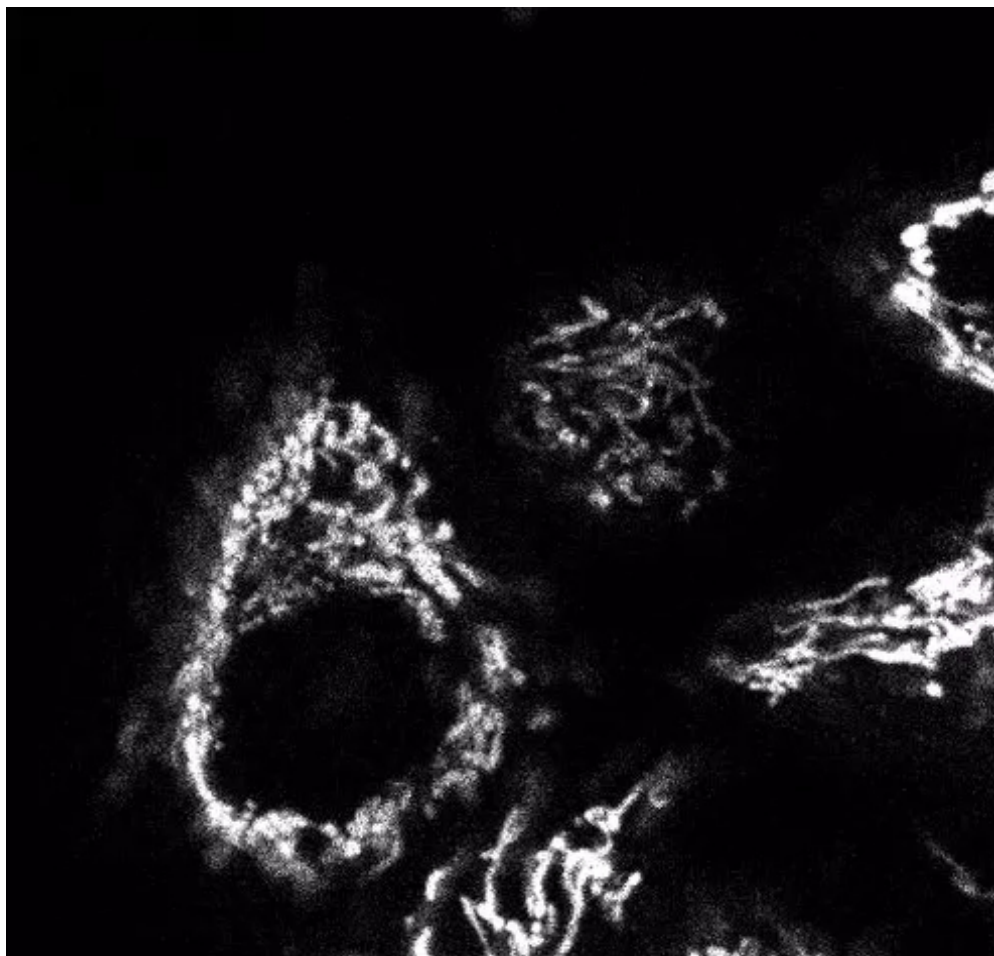

**Movie SM1:** Long term live cell experiment (*HeLa* cells stained with 10 nM of **1c**;  $M = \text{mol dm}^{-3}$ ; 561 nm excitation, emission: 580 – 700 nm).
